# Supplementary material for: DNA polymerase POLD1 promotes proliferation and metastasis of bladder cancer by stabilizing MYC
Source: PubMed Central journal article supplement (PMC10140023; doi:10.1038/s41467-023-38160-x), 2023-04-27
Supplement: 41467_2023_38160_MOESM1_ESM.pdf [file 41467_2023_38160_MOESM1_ESM.pdf]

## **Supplementary Information**

### **DNA polymerase POLD1 promotes proliferation and metastasis of bladder cancer by stabilizing MYC**

Yejinpeng Wang, Lingao Ju, Gang Wang, Kaiyu Qian, Wan Jin, Mingxing Li, Jingtian  
Yu, Yiliang Shi, Yongzhi Wang, Yi Zhang, Yu Xiao, Xinghuan Wang



( $\log_2(\text{TPM}+1)$ ). **(b-c)** The center line indicates the median, bounds of box = 25th and 75th percentiles; bars = 10th and 90th percentiles; whiskers = min to max. **d.** The mRNA distribution of *POLD1* ( $\log_2(\text{FPKM})$ ) in the NMIBC and MIBC subtypes in the GSE13507 cohort. **e.** Distribution of *POLD1* mRNA levels at different tumor sizes ( $< 3$  cm and  $\geq 3$  cm) in the UROMOL cohort. Statistical significance was determined by two-tailed Wilcoxon rank-sum test. The n number represents n biologically independent patient samples in each group. Exact n values are marked in **(b-e)**. ns: not significant. BLCA: Bladder Urothelial Carcinoma; BRCA: Breast invasive carcinoma; CESC: Cervical squamous cell carcinoma and endocervical adenocarcinoma; CHOL: Cholangiocarcinoma; COAD: Colon adenocarcinoma; ESCA: Esophageal carcinoma; HNSC: Head and Neck squamous cell carcinoma; KICH: Kidney Chromophobe; KIRC: Kidney renal clear cell carcinoma; KIRP: Kidney renal papillary cell carcinoma; LIHC: Liver hepatocellular carcinoma; LUAD: Lung adenocarcinoma; LUSC: Lung squamous cell carcinoma; PAAD: Pancreatic adenocarcinoma; PCPG: Pheochromocytoma and Paraganglioma; PRAD: Prostate adenocarcinoma; READ: Rectum adenocarcinoma; SARC: Sarcoma; SKCM: Skin Cutaneous Melanoma; STAD: Stomach adenocarcinoma; THCA: Thyroid carcinoma; THYM: Thymoma; UCEC: Uterine Corpus Endometrial Carcinoma. NMIBC: non-muscular invasive bladder cancer; MIBC: muscular invasive bladder cancer; TPM: Transcripts Per Kilobase Million; FPKM: Fragments Per Kilobase Million; ns: not significant.

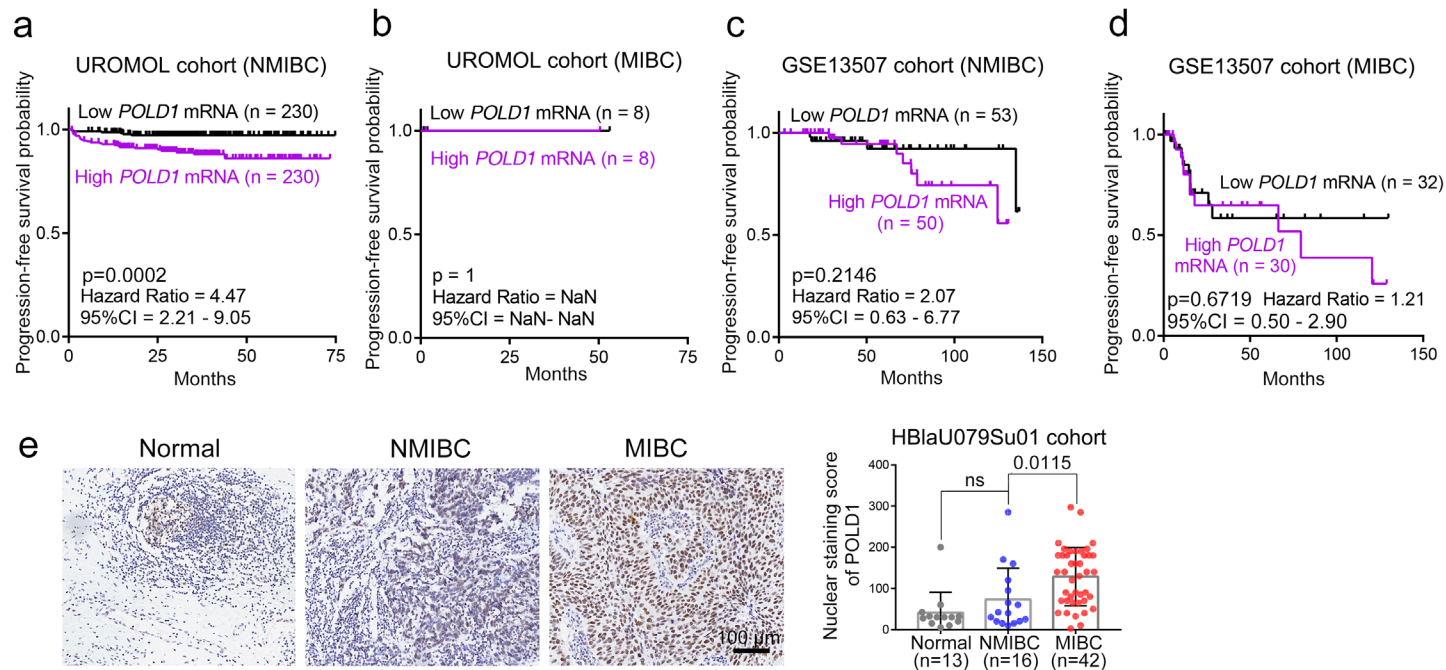

**Supplementary Figure 2. POLD1 is associated with prognosis and malignancy of BLCA. Related to Figure 1.**

The prognostic curve (progression-free survival) of different *POLD1* mRNA levels in the two subtypes of **a**. NMIBC and **b**. MIBC in the UROMOL cohort was analyzed. The prognostic curve (progression-free survival) of different *POLD1* mRNA levels in the two subtypes of **c**. NMIBC and **d**. MIBC in the GSE13507 cohort was analyzed. The patients were divided into high *POLD1* mRNA level group and low *POLD1* mRNA level group according to the median *POLD1* expression. Statistical significance was determined by two-tailed log-rank test of Kaplan-Meier analysis. The n number represents n biologically independent patient samples in each group. Exact n values are marked in **(a-d)**. **e**. Representative pictures (left panel) and statistical figures (right panel) of immunohistochemistry staining analysis of *POLD1* protein level in different type of organization (Normal: n = 13 tissue samples; NMIBC: n = 16 tissue samples; MIBC: n = 42 tissue samples) in HBlau079Su01 cohort. *POLD1* nuclear staining score = The intensity of nuclear staining×Staining positive area. Data are mean ± SD. Statistical significance was determined by two-tailed Student's T-test. NMIBC: non-muscular invasive bladder cancer; MIBC: muscular invasive bladder cancer; CI: Confidence Interval; NaN: Not a Number (Since there was no progression event in both groups of patients, HR and CI could not be calculated here, and NaN was automatically

given by R software); ns: not significant.

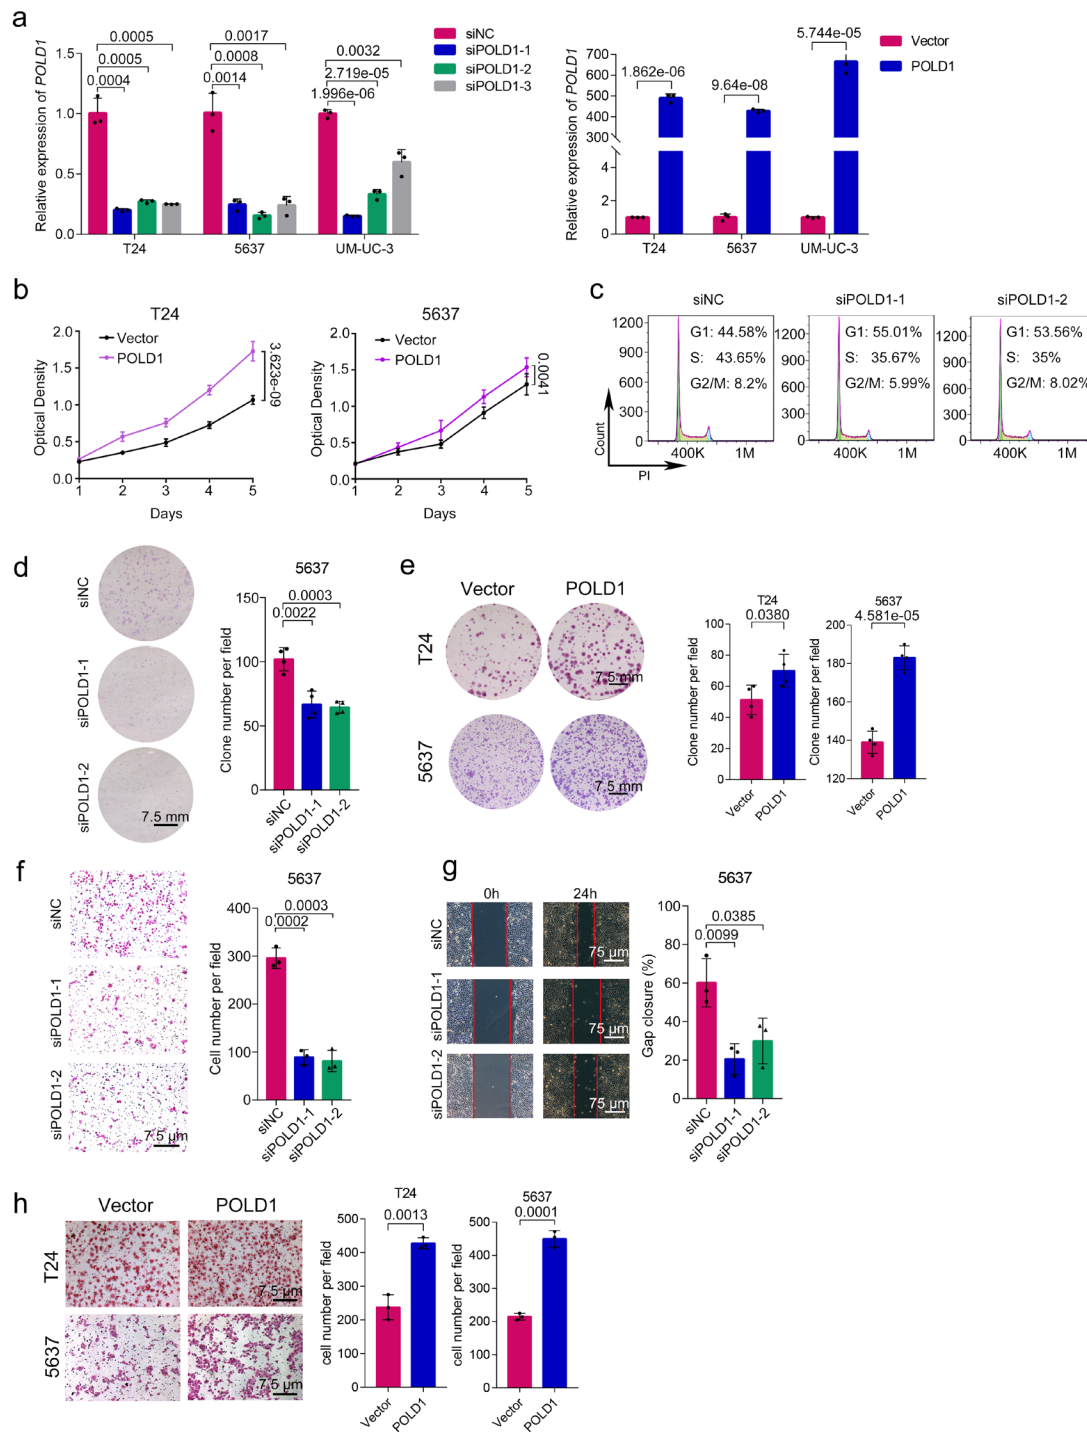

**Supplementary Figure 3. POLD1 promotes BLCA proliferation and metastasis. Related to Figure 2.**

**a.** Validation of knockdown efficiency of three *POLD1*-specific siRNA by qPCR assays in T24, 5637 and UM-UC-3 cells (left panel). Validation of GFP-POLD1 overexpression efficiency in T24, 5637 and UM-UC-3 cells by qPCR assays (right panel). Graph shows mean  $\pm$  SD,  $n = 3$  biologically independent experiments in each group. **b.** The cell proliferation curve of T24 and 5637 cells with POLD1 overexpression. Graph shows mean  $\pm$  SD,  $n = 8$  biologically independent experiments in each group. **c.** Flow cytometric analysis of DNA content for cell-cycle progression from propidium iodide (PI, 100  $\mu$ g/mL) staining of T24 cells with or without POLD1 overexpression. **d.** Representative images (left panel) and statistical graph (right panel)

of clone formation assays from the indicated groups with *POLD1* depletion in 5637 cells (n = 4 biologically independent experiments in each group). **e.** Representative images (left panel) and statistical graph (right panel) of clone formation assays from the indicated groups with *POLD1* overexpression in T24 and 5637 cells (n = 4 biologically independent experiments in each group). **f.** Representative images (left panel) and cell numbers (right panel) of transwell assays from the indicated groups with or without *POLD1* knockdown in 5637 cells (n = 3 biologically independent experiments in each group). **g.** Representative images (left panel) and statistical results (right panel) of wound healing assay in 5637 cells with or without *POLD1* depletion (n = 3 biologically independent experiments in each group). Gap closure (%) = (0 h distance - 24 h distance) / 0 h distance 100%. The “distance” here refers to the shortest distance between the red lines in the diagram. **h.** Representative images (left panel) and cell numbers (right panel) of transwell assays from the indicated groups with or without *POLD1* overexpression in T24 and 5637 cells (n = 3 biologically independent experiments in each group). Data are mean ± SD. Statistical significance was determined by two-tailed Student’s T-test.

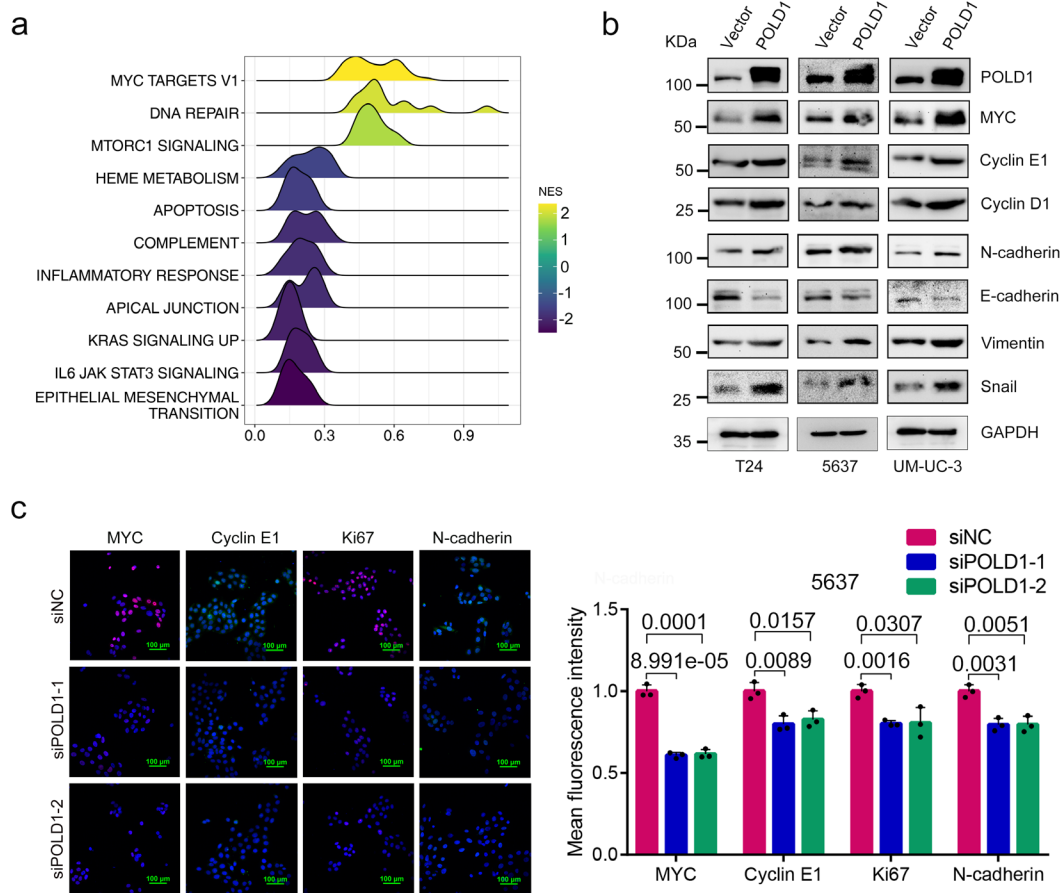

**Supplementary Figure 4. The abnormal expression of *POLD1* leads to the disturbance of cell cycle and EMT process. Related to Figure 2.**

**a.** GSEA of genes that were both positively correlated with *POLD1* (TCGA-BLCA, the gene set with significant positive correlation with *POLD1* in TCGA-BLCA cohort,  $p < 0.05$  and Pearson correlation coefficient  $> 0$ ) and positively regulated by *POLD1* (the gene set was significantly down-regulated after *POLD1* was knocked down in 5637 cells,  $p < 0.05$ ). The GSEA here was performed by the R package “clusterProfiler”. The X-axis showed  $\log_2$  times of the change in the expression of the core enriched genes in the enrichment pathway, with a positive value indicating up-regulated expression and a negative value indicating down-regulated expression. **b.** Immunoblot of cell cycle- (Cyclin E1, Cyclin D1) and EMT- (N-cadherin, E-cadherin, Vimentin and Snail) related protein with or without *POLD1* overexpression in T24, 5637 and UM-UC-3. GAPDH was used as loading control. **c.** Representative images of immunofluorescence analysis (left panel) and statistics results (right panel) of the effect of *POLD1* knockdown on MYC, Cyclin E1, Ki67 and N-cadherin in 5637 cells. The average fluorescence intensity was calculated by Image J software. (Graph shows mean  $\pm$  SD,  $n = 3$  biologically independent experiments in each group). Statistical significance was determined by two-tailed Fisher’s exact test (**a**) and two-tailed Student’s T-test (**c**). NES: Normalized Enrichment Score.



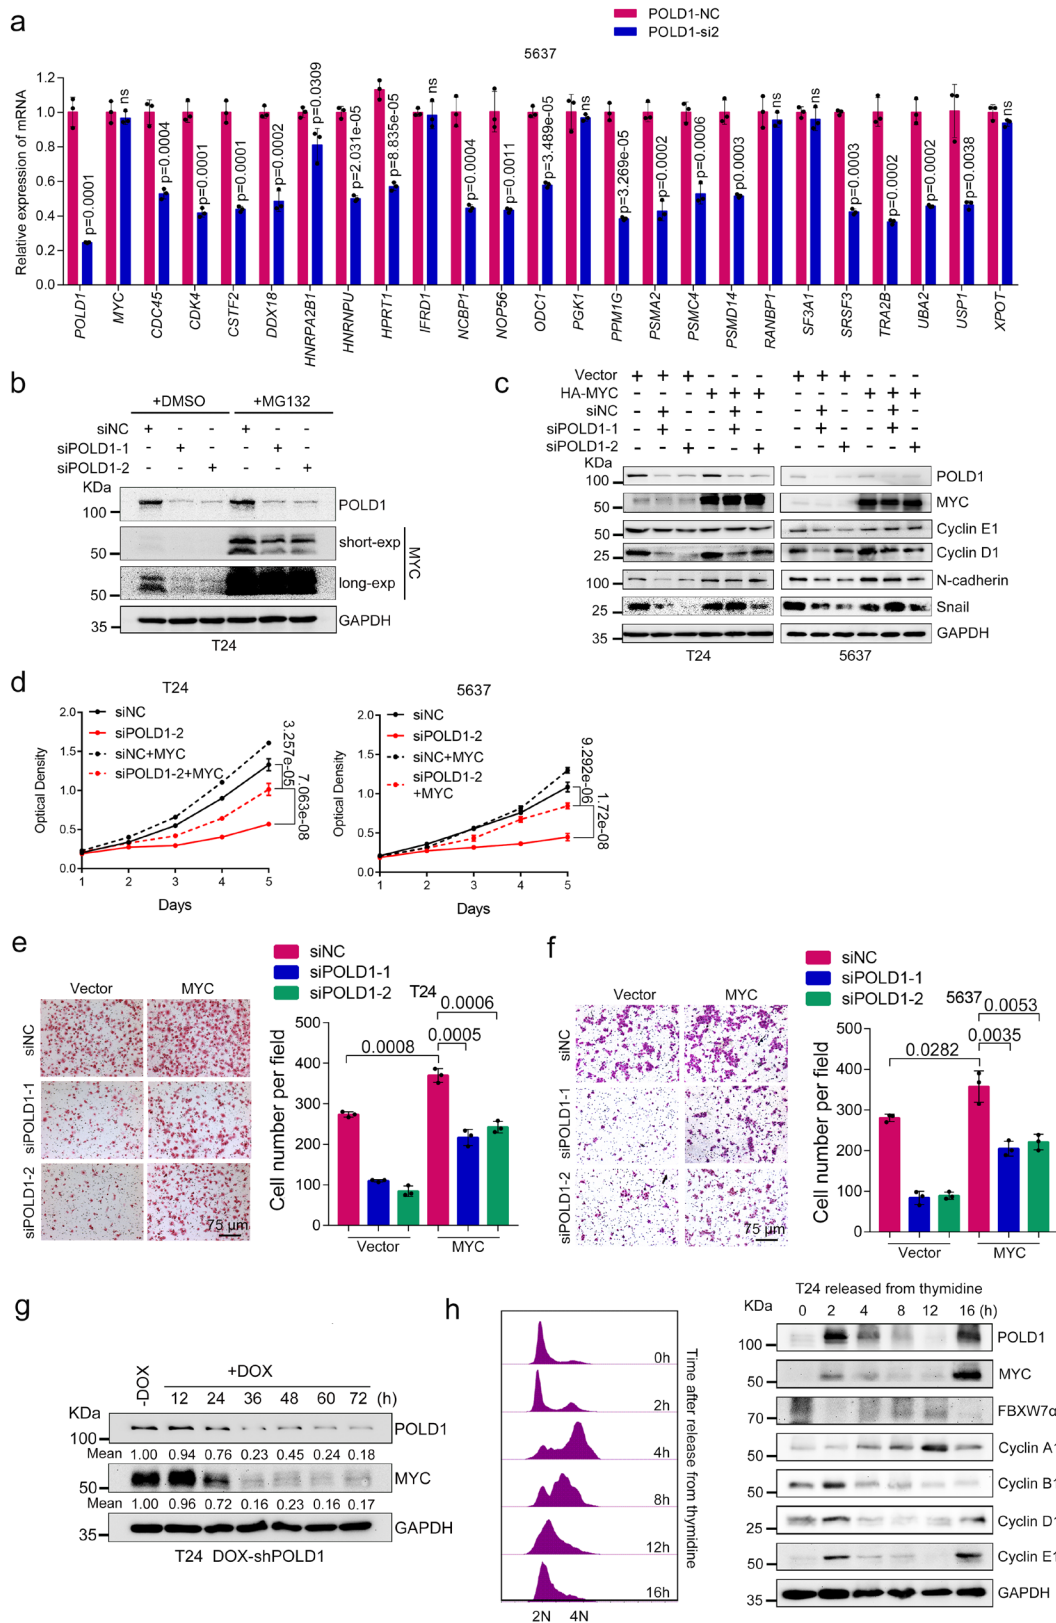

**Supplementary Figure 5. POLD1 promotes BLCA proliferation and metastasis by stabilizing MYC. Related to Figure 4.**

**a.** qPCR test to verify the differential expression of MYC target genes after *POLD1* depletion in RNA-seq assay (corresponding to the gene set in Fig. 4b). Graph shows mean  $\pm$  SD,  $n = 3$  biologically independent experiments in each group. **b.** The changes of MYC were analyzed by Western blot after administration of MG132 in T24 cells

with *POLD1* knocked down. **c.** Western blot was used to detect the changes of Cyclin E1, Cyclin D1, N-cadherin and Snail after MYC overexpression in T24 and 5637 cells with *POLD1* depletion. **d.** Proliferation curves of MYC overexpression in T24 and 5637 cells after *POLD1* knockdown (Graph shows mean  $\pm$  SD, n = 6 biologically independent experiments in each group). **e-f.** Representative images and cell numbers of transwell assays from the indicated groups with or without overexpression MYC in T24 (**e**) and 5637 (**f**) cells with *POLD1* knockdown (Data are mean  $\pm$  SD, n = 3 biologically independent experiments in each group). **g.** Representative images of Western blot analysis of the expression changes of POLD1 and MYC after *POLD1* knockdown induced by DOX at gradient time point (n = 3 biologically independent experiments in each group). The protein level of POLD1 and MYC was quantified by Image J software and standardized with GAPDH. **h.** The protein abundance of POLD1, MYC and FBXW7 $\alpha$  fluctuates during cell cycle progression. T24 cells synchronized in late G1/S phase by double thymidine (2 mM) following by releasing back into the cell cycle. Left panel: flow cytometry of cell cycle changes at different time points after the cell cycle restart. Right panel: Western blot analysis of protein expression of POLD1, MYC, and FBXW7 $\alpha$  at different time points after cell cycle restart. GAPDH was used as loading control. Statistical significance was determined by two-tailed Student's T-test (**a**, **d-f**). short-exp: short exposure; long-exp: long exposure; ns: not significant.

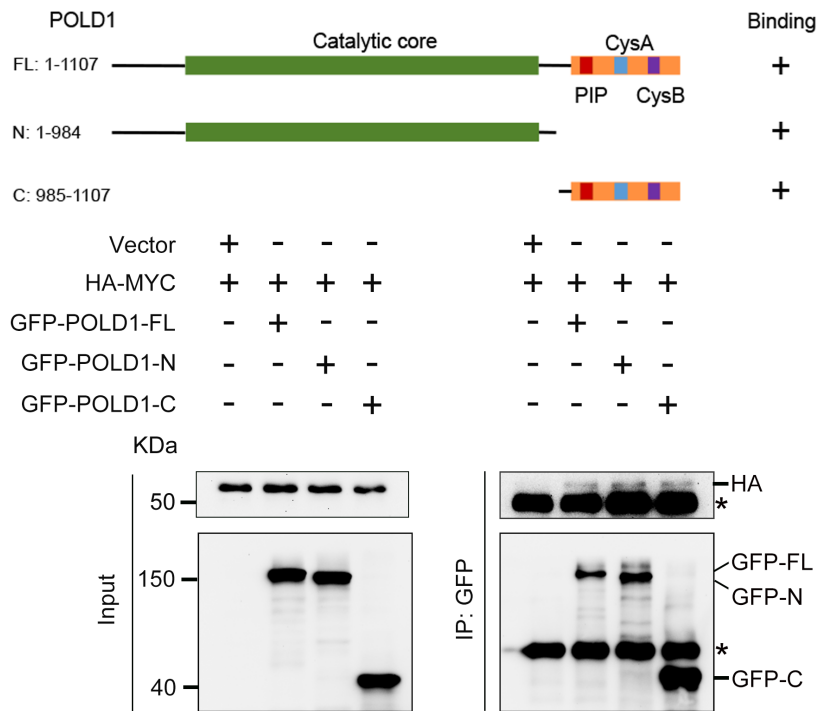

**Supplementary Figure 6. MYC can bind to the N-terminal and C-terminal domains of POLD1. Related to Figure 4.**

Schematic diagram of various POLD1 truncations in the binding assays (top panel). Western blot analysis of GFP-POLD1, HA-MYC after GFP-IP in 293T cells with overexpression fragment GFP-POLD1 and full-length HA-MYC (bottom panel). The input was 10% of the extract used for the IP. \* represents the heavy chain. PIP: PCNA-interacting protein motif; CysA: The cysteine-rich metal-binding motif A; CysB: The cysteine-rich metal-binding motif B.

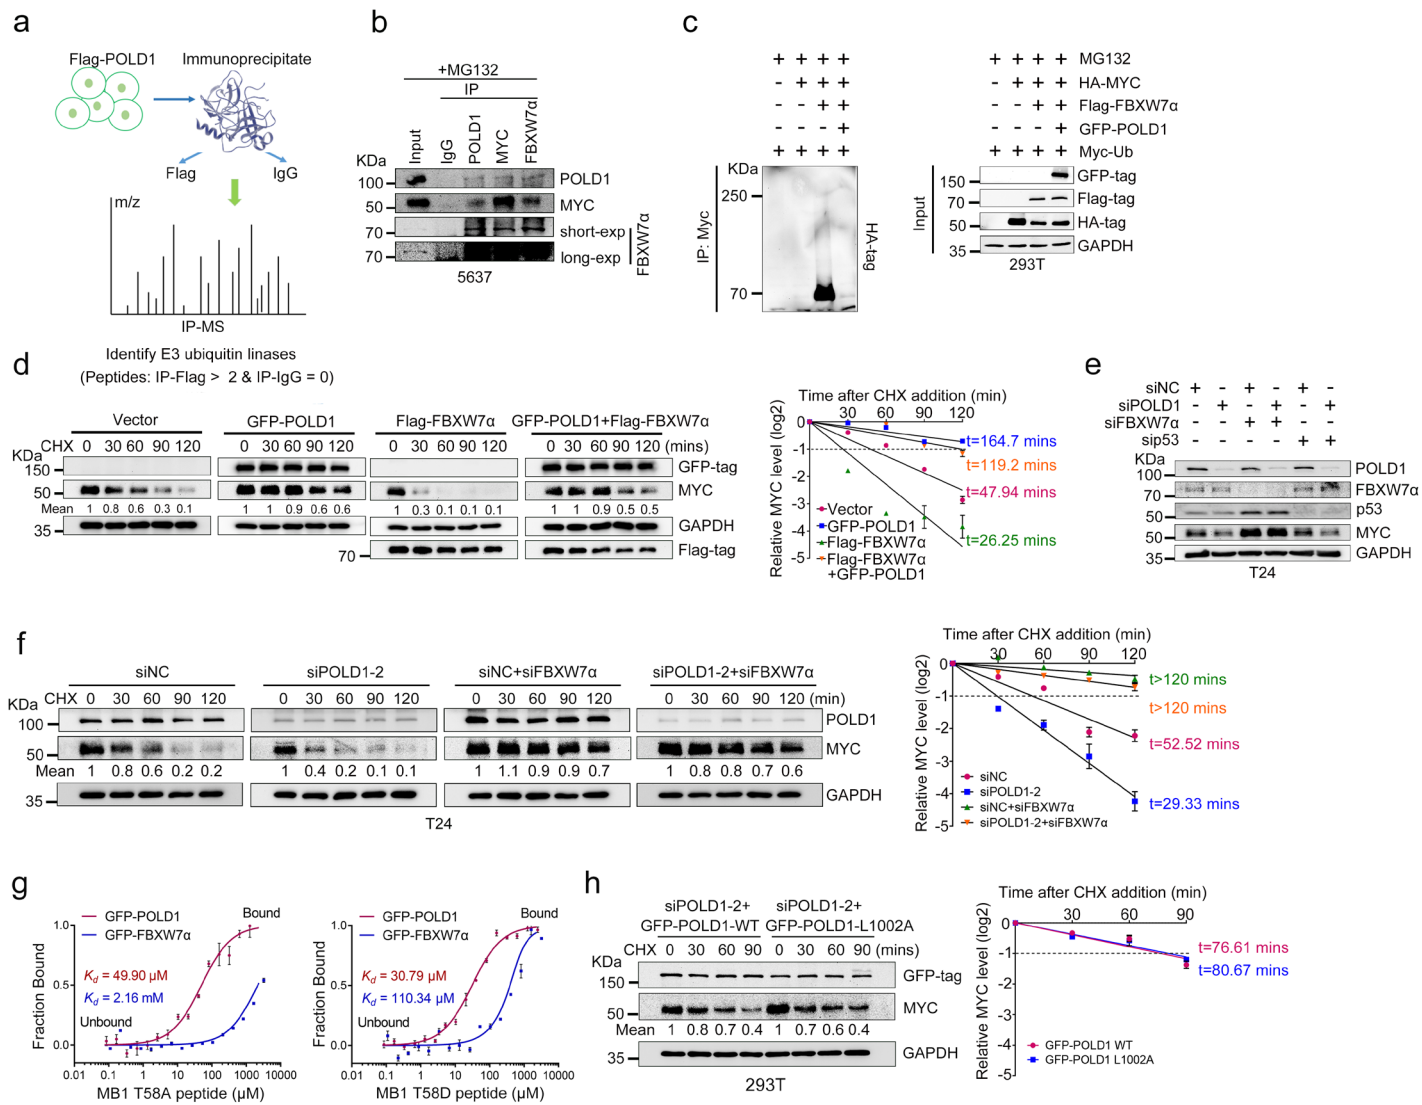

**Supplementary Figure 7. POLD1 competes with FBXW7 $\alpha$  to bind MYC in a manner independent of DNA polymerase activity, thereby stabilizing MYC. Related to Figure 6.**

**a.** Schematic diagram of screening E3 ubiquitin ligases that interact with POLD1. Flag-POLD1 was overexpressed in 293T cells and then lysed. The IgG and Flag-IP assays were carried out on the lysate respectively, and then the interacting proteins were detected by mass spectrometry. The screening condition was set as unique peptides > 2 and IgG results were negative. **b.** Western blot analysis of POLD1, MYC and FBXW7 $\alpha$  after IgG-IP, POLD1-IP, MYC-IP or FBXW7 $\alpha$ -IP in 5637 cells. MYC was used as a positive control for FBXW7 $\alpha$  endogenous interaction. The input was 10% of the extract used for the endogenous IP. All samples were added with MG132 (10  $\mu$ M) for 6 h before harvesting cells. **c.** Western blot of ubiquitination of HA-MYC after Myc-Ub-IP under denaturing conditions in 293T cells expressing GFP-POLD1, HA-MYC, Flag-FBXW7 $\alpha$  and Myc-Ub. The cells of all samples were incubated with MG132 (10  $\mu$ M) for 6 h before harvest. **d.** Representative images of the effect of Vector or GFP-POLD1 or Flag-FBXW7 $\alpha$  or GFP-POLD1 plus Flag-FBXW7 $\alpha$  overexpression on MYC degradation in 293T cells were incubated with CHX (50  $\mu$ g/mL) for the indicated times (left panel). Statistical diagram of protein half-life assays (right panel). **e.** Western blot analysis of POLD1, MYC, FBXW7 $\alpha$  and p53 after *FBXW7 $\alpha$*  or *p53* depletion in T24 cells with *POLD1* knockdown. **f.** Representative images of Western blot analysis (left panel) and statistics results (right panel) of MYC half-life after depletion of *FBXW7 $\alpha$*  in T24 cells with *POLD1* knockdown. **g.** MST analysis was used to measure the binding affinity of lysates of overexpressed GFP-POLD1 or GFP-FBXW7 $\alpha$  in 293T cells and the MYC-MB1 T58A (left panel) and MYC-MB1 T58D (right panel) peptide. **h.** Representative images of Western blot analysis (left panel) and statistics results (right panel) of MYC half-life after overexpression GFP-POLD1 WT or GFP-POLD1 L1002A in 293T cells with *POLD1* knockdown. The cells were incubated with CHX (50  $\mu$ g/mL) for the indicated times. Data are mean  $\pm$  SD, n = 3 biologically independent experiments in each group (**d, f-h**). GAPDH was used as loading control (**c-f, h**). All proteins in this figure were quantified by Image J software. short-exp: short exposure; long-exp: long exposure.

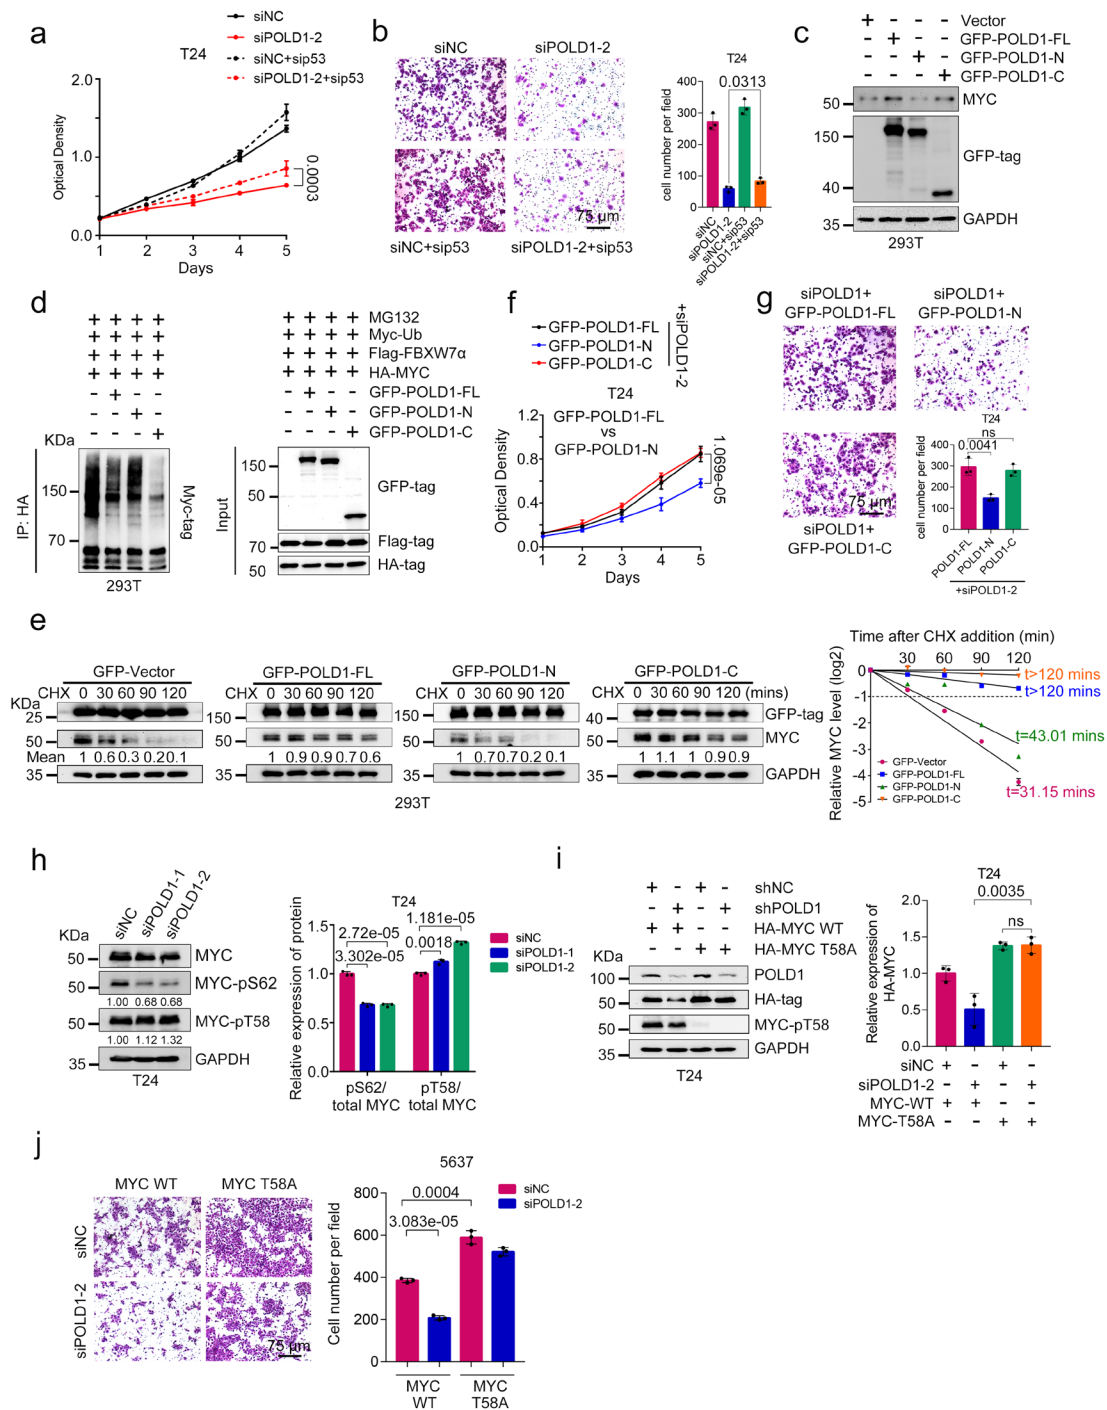

### Supplementary Figure 8. The C-terminal domain of POLD1 plays a key role in stabilizing MYC. Related to Figure 6.

**a.** The cell proliferation curve of *p53* deletion in T24 cells with *POLD1* knockdown. Graph shows mean  $\pm$  SD,  $n = 6$  biologically independent experiments in each group. **b.** Representative images (left panel) and cell numbers (right panel) of transwell assays from the indicated groups with or without *p53* deletion in T24 cells with *POLD1* knockdown ( $n = 3$  biologically independent experiments in each group). **c.** Western blot of MYC after full-length and fragment GFP-POLD1 was overexpression in 293T cells. **d.** Western blot of Myc-Ub after HA-IP under denaturing conditions in 293T cells expressing full-length and fragment GFP-POLD1, HA-MYC, Flag-FBXW7 $\alpha$  and Myc-

Ub. The cells of all samples were incubated with MG132 (10  $\mu$ M) for 6 h before harvest. **e.** Representative images of Western blot analysis (left panel) and statistics results (right panel) of MYC half-life after full-length and fragment GFP-POLD1 was overexpression in 293T cells. The cells were incubated with CHX (50  $\mu$ g/mL) for the indicated times (n = 3 biologically independent experiments in each group). **f.** The cell proliferation curve of overexpressed full-length and fragment GFP-POLD1 in T24 cells with *POLD1* knockdown. Graph shows mean  $\pm$  SD, n = 6 biologically independent experiments in each group. **g.** Representative images (left panel) and cell numbers (right panel) of transwell assays after full-length and fragment GFP-POLD1 overexpressed in T24 cells with *POLD1* knockdown (n = 3 biologically independent experiments in each group). **h.** Representative images of Western blot (left panel) and statistics results (right panel) of total MYC, MYC of phosphorylated serine 62 (pS62) and MYC of phosphorylated threonine-58 (pT58) after *POLD1* depletion in T24 cells (n = 3 biologically independent experiments in each group). **i.** Representative images of Western blot (left panel) and statistics results (right panel) of POLD1, total MYC, and MYC of phosphorylated threonine-58 (pT58) after WT or T58A HA-MYC overexpressed in T24 cells with *POLD1* depletion (n = 3 biologically independent experiments in each group). **j.** Representative images (left panel) and cell numbers (right panel) of transwell assays with or without WT or T58A HA-MYC overexpressed in 5637 cells with *POLD1* knockdown (n = 3 biologically independent experiments in each group). Graph shows mean  $\pm$  SD. All proteins in this figure were quantified by Image J software. GAPDH was used as loading control (**c**, **e**, **h-i**). Statistical significance was determined by two-tailed Student's T-test (**a-b**, **f-j**). ns: not significant.

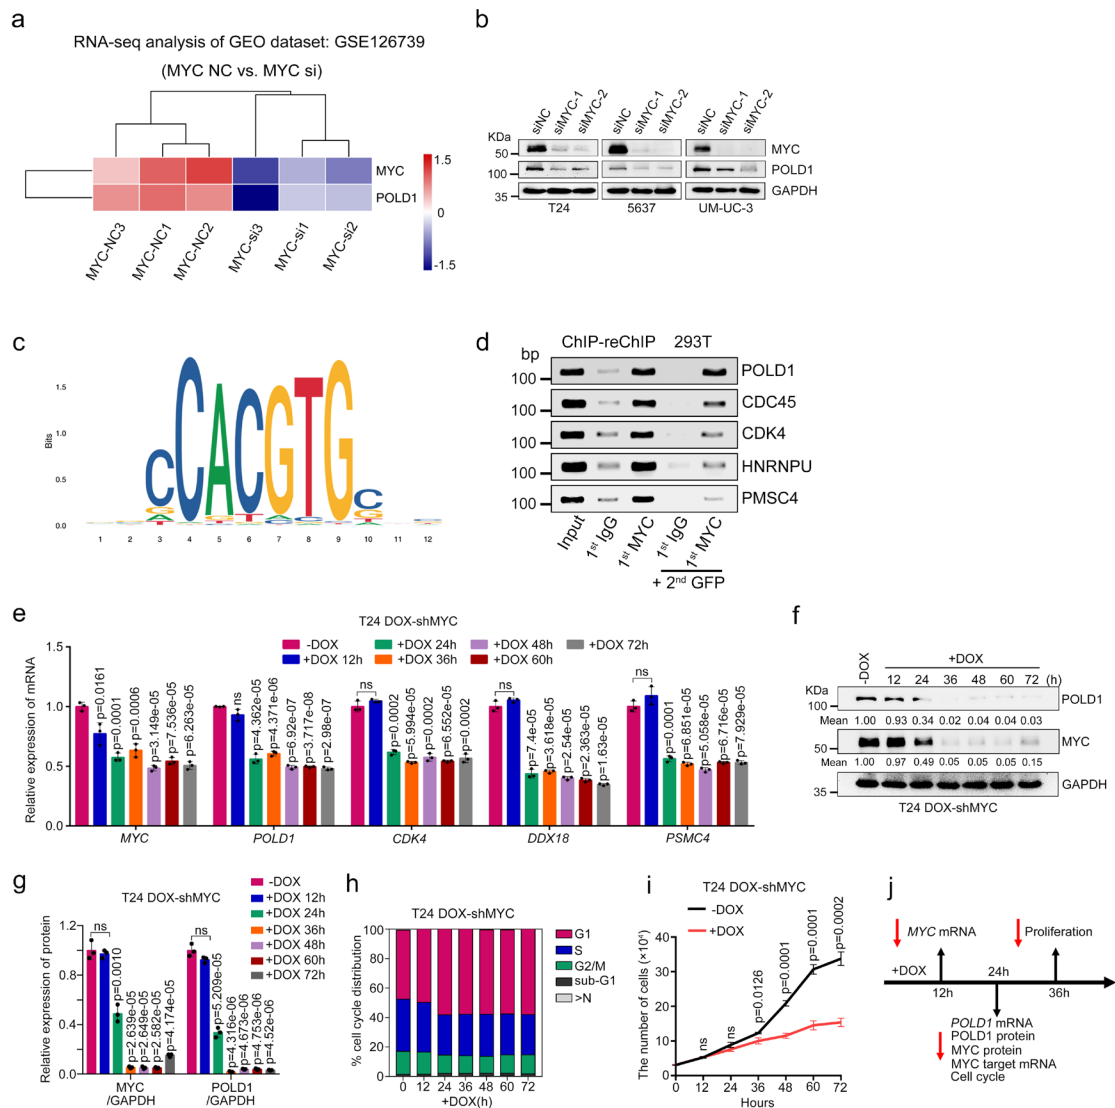

**Supplementary Figure 9. *POLD1* is the target gene of MYC transcriptional regulation, and can form complexes with MYC to enhance the transcriptional activity of MYC. Related to Figure 7.**

**a.** A heatmap of *POLD1* and *MYC* upon *MYC* knockdown in lymphoma Jurkat cells ( $n = 3$  per group). **b.** Western blot of *POLD1* and *MYC* after *MYC* deletion in T24, 5637 and UM-UC-3 cells. **c.** The motif sequence of *MYC* provided by the JASPAR database (<https://jaspar.genereg.net/>). **d.** The *POLD1*/*MYC* complex was found on *POLD1*, *CDC45*, *CDK4*, etc. promoters. ChIP and reChIP assays were performed in 293T cells with the indicated antibodies. **e.** qPCR analysis of *MYC* and its target genes in DOX-induced *shMYC* T24 cells. We harvested the cells at the specified time after adding DOX. **f.** Representative images of Western blot analysis and **g.** statistical graph of the expression changes of *POLD1* and *MYC* after *MYC* knockdown induced by DOX at gradient time point. **h.** Cell cycle and **i.** proliferation analysis after *MYC* knockdown induced by DOX at gradient time point. **j.** Timeline of all assay results of DOX-induced *MYC* knockdown in this section. Graph shows mean  $\pm$  SD,  $n = 3$  biologically independent experiments in each group (**e**, **g**, **i**). Statistical significance was determined by two-tailed Student's T-test (**e**, **g**, **i**). ns: not significant.



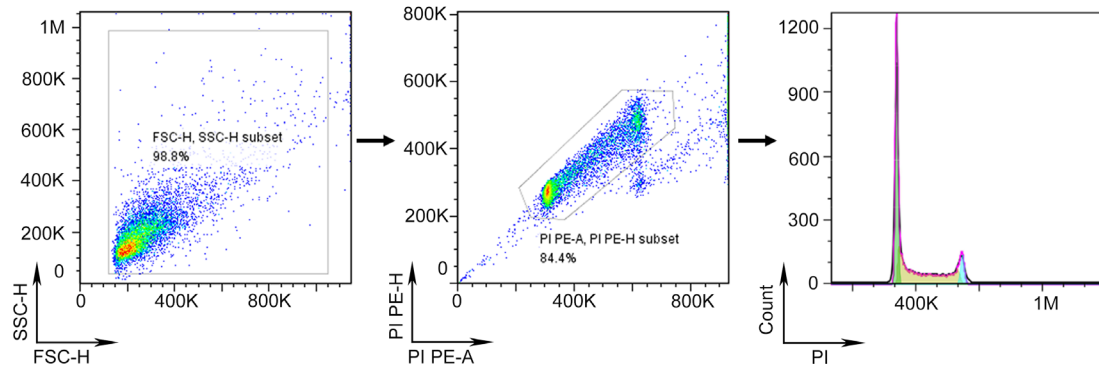

**Supplementary Figure 10. Gating strategy for flow analysis.**

This gated strategy was used in all flow cytometric cell cycle correlation analyses in this study (Related to Fig. 2b, 4i, and Supplementary Fig. 3c, 5h, 9h). The cell population was identified using FSC and SSC (left panel), this cell population gate is then placed on PI PE-A and PI PE-H plot (middle panel), finally, the cell cycle curve was fitted (right panel).

## Supplementary Tables

**Supplementary Table 1. POLD1 related GSEA analysis.**

| Description                       | setSize | enrichmentScore | NES      | pvalue   | p.adjust | qvalues  | rank |
|-----------------------------------|---------|-----------------|----------|----------|----------|----------|------|
| MYC_TARGETS_V1                    | 44      | 0.571823958     | 2.35538  | 3.61E-08 | 1.05E-06 | 6.08E-07 | 360  |
| DNA_REPAIR                        | 19      | 0.589086165     | 2.021741 | 0.000207 | 0.0015   | 0.000871 | 237  |
| MTORC1_SIGNALING                  | 49      | 0.414334099     | 1.736648 | 0.001654 | 0.007995 | 0.004643 | 233  |
| HEME_METABOLISM                   | 24      | -0.277905838    | -1.49354 | 0.011575 | 0.033567 | 0.019494 | 607  |
| APOPTOSIS                         | 18      | -0.334238928    | -1.60731 | 0.014404 | 0.037974 | 0.022054 | 423  |
| COMPLEMENT                        | 21      | -0.349614234    | -1.86622 | 0.005598 | 0.018039 | 0.010476 | 582  |
| INFLAMMATORY_RESPONSE             | 31      | -0.300028389    | -1.86804 | 0.001966 | 0.008146 | 0.004731 | 506  |
| APICAL_JUNCTION                   | 15      | -0.413718017    | -1.89225 | 0.004276 | 0.015502 | 0.009003 | 511  |
| KRAS_SIGNALING_UP                 | 32      | -0.330648923    | -2.0868  | 0.000161 | 0.0015   | 0.000871 | 253  |
| IL6_JAK_STAT3_SIGNALING           | 15      | -0.474612666    | -2.17077 | 0.000802 | 0.004652 | 0.002701 | 423  |
| EPITHELIAL_MESENCHYMAL_TRANSITION | 30      | -0.404172543    | -2.47338 | 2.23E-05 | 0.000324 | 0.000188 | 391  |

NES: Normalized Enrichment Score. Statistical significance of the GSEA analysis was determined by two-tailed Fisher's exact test.

**Supplementary Table 2. POLD1 related GO analysis.**

| ONTOLOGY | ID         | Description                            | pvalue      | p.adjust  | qvalue     | Count |
|----------|------------|----------------------------------------|-------------|-----------|------------|-------|
| BP       | GO:0042060 | wound healing                          | 0.000804298 | 0.0264204 | 0.02293355 | 38    |
| BP       | GO:0034599 | cellular response to oxidative stress  | 7.99E-06    | 0.0010429 | 0.00090522 | 34    |
| BP       | GO:0045740 | positive regulation of DNA replication | 4.31E-06    | 0.0006616 | 0.00057431 | 11    |
| BP       | GO:0006275 | regulation of DNA replication          | 1.03E-05    | 0.0012503 | 0.00108533 | 18    |
| BP       | GO:0006261 | DNA-dependent DNA replication          | 3.73E-06    | 0.0005947 | 0.00051625 | 23    |
| BP       | GO:2000278 | regulation of DNA biosynthetic process | 2.22E-06    | 0.0004148 | 0.00036006 | 19    |
| BP       | GO:0071496 | cellular response to external stimulus | 4.26E-09    | 5.56E-06  | 4.83E-06   | 44    |
| BP       | GO:0006260 | DNA replication                        | 2.92E-08    | 2.54E-05  | 2.21E-05   | 37    |
| BP       | GO:0044786 | cell cycle DNA replication             | 0.001111072 | 0.0329723 | 0.02862075 | 8     |
| MF       | GO:0003688 | DNA replication origin binding         | 0.001277548 | 0.0445722 | 0.03934748 | 5     |
| MF       | GO:0051087 | chaperone binding                      | 0.000227239 | 0.0125917 | 0.01111571 | 16    |
| MF       | GO:0051787 | misfolded protein binding              | 0.000119592 | 0.0086659 | 0.00765004 | 8     |
| MF       | GO:0044389 | ubiquitin-like protein ligase binding  | 5.93E-05    | 0.0059371 | 0.00524118 | 35    |
| MF       | GO:0001671 | ATPase activator activity              | 6.82E-05    | 0.0059371 | 0.00524118 | 8     |
| MF       | GO:0031625 | ubiquitin protein ligase binding       | 1.61E-05    | 0.0021574 | 0.00190446 | 35    |
| MF       | GO:0004529 | exodeoxyribonuclease activity          | 1.83E-05    | 0.0021574 | 0.00190446 | 8     |
| MF       | GO:0045296 | cadherin binding                       | 3.60E-07    | 0.0001132 | 9.99E-05   | 42    |
| MF       | GO:0003697 | single-stranded DNA binding            | 3.08E-06    | 0.0007254 | 0.0006404  | 21    |
| CC       | GO:0005925 | focal adhesion                         | 1.05E-06    | 0.0002823 | 0.00024384 | 46    |
| CC       | GO:0030055 | cell-substrate junction                | 1.66E-06    | 0.0002823 | 0.00024384 | 46    |
| CC       | GO:0030684 | preribosome                            | 1.84E-06    | 0.0002823 | 0.00024384 | 16    |
| CC       | GO:0005635 | nuclear envelope                       | 1.99E-06    | 0.0002823 | 0.00024384 | 49    |
| CC       | GO:0042470 | melanosome                             | 2.76E-06    | 0.0002823 | 0.00024384 | 19    |
| CC       | GO:0048770 | pigment granule                        | 2.76E-06    | 0.0002823 | 0.00024384 | 19    |
| CC       | GO:1904813 | ficolin-1-rich granule lumen           | 5.25E-06    | 0.0004601 | 0.00039744 | 20    |
| CC       | GO:0101031 | chaperone complex                      | 9.68E-06    | 0.0006693 | 0.00057813 | 9     |
| CC       | GO:0101002 | ficolin-1-rich granule                 | 9.83E-06    | 0.0006693 | 0.00057813 | 25    |

BP: Biological Process; MF: Molecular Function; CC: Cellular Component. Statistical significance of the GO analysis was determined by two-tailed Fisher's exact test.

**Supplementary Table 3. Details of antibodies.**

| <b>Antibody</b>   | <b>Identifier</b> | <b>Source</b>             | <b>Dilution or amount</b>     |
|-------------------|-------------------|---------------------------|-------------------------------|
| anti-GST-Tag      | MY1903            | MerryBio                  | IP/1 µg WB/1:1000             |
| anti-His-Tag      | 66005-1-Ig        | Proteintech               | IP/1 µg WB/1:1000             |
| anti-HA-Tag       | TA180128          | Origene                   | IP/1 µg WB/1:1000             |
| anti-GFP-Tag      | SC-9996           | Santa Cruz                | IP/1 µg WB/1:1000             |
| anti-GFP-Tag      | ab290             | Abcam                     | IP/1 µg WB/1:1000 ChIP/8µg    |
| anti-Flag-Tag     | F1804             | Sigma                     | IP/1 µg WB/1:1000             |
| anti-Myc-Tag      | AE010             | Abclonal                  | IP/1 µg WB/1:1000             |
| anti-POLD1        | SC-17776          | Santa Cruz                | WB/1:200 IHC/1:50 IF/1:50     |
| anti-POLD1        | ab264345          | Abcam                     | IP/1 µg WB/1:1000             |
| anti-MYC          | 18583             | Cell Signaling Technology | IP/1 µg WB/1:1000 IF/1:200    |
| anti-MYC          | ab32072           | Abcam                     | WB/1:1000 ChIP/8 µg IHC/1:100 |
| anti-MYC-pT58     | 46650             | Cell Signaling Technology | WB/1:1000                     |
| anti-MYC-pS62     | 13748             | Cell Signaling Technology | WB/1:1000                     |
| anti-FBXW7        | ab109617          | Abcam                     | IP/1 µg WB/1:1000 IF/1:200    |
| anti-Cyclin A1+A2 | ab185619          | Abcam                     | WB/1:1000                     |
| anti-Cyclin B1    | 4135S             | Cell Signaling Technology | WB/1:1000                     |
| anti-Cyclin E1    | SC-377100         | Santa Cruz                | WB/1:200 IF/1:50              |
| anti-Cyclin D1    | SC-753            | Santa Cruz                | WB/1:200                      |
| anti-N-cadherin   | 13116S            | Cell Signaling Technology | WB/1:1000                     |
| anti-E-cadherin   | 3195S             | Cell Signaling Technology | WB/1:1000                     |
| anti-Vimentin     | 5741S             | Cell Signaling Technology | WB/1:1000                     |
| anti-Snail        | 3879S             | Cell Signaling Technology | WB/1:1000                     |
| anti-MAX          | SC-8011           | Santa Cruz                | IP/1 µg WB/1:200              |
| anti-Ubiquitin    | ab7254            | Abcam                     | WB/1:1000                     |
| anti-p53          | 10442-1-AP        | Proteintech               | WB/1:1000                     |
| anti-GAPDH        | SC-365062         | Santa Cruz                | WB/1:200                      |
| anti-Ki67         | ab16667           | Abcam                     | IHC/1:200 IF/1:200            |
| anti-MYC          | 10828-1-AP        | Proteintech               | IF 1:100                      |
| anti-N-cadherin   | 66219-1-Ig        | Proteintech               | IF 1:200                      |

**Supplementary Table 4. Primers used in qPCR assays.**

| <b>qPCR assay:</b> |                          |                          |
|--------------------|--------------------------|--------------------------|
| <b>Gene Symbol</b> | <b>Forward</b>           | <b>Reverse</b>           |
| POLD1              | ACCTTCATCCGTATCATGGAC    | ATGAAGAGTCCCGGATGTTG     |
| MYC                | CTGGTGCTCCATGAGGAGA      | CCTGCCTCTTTTCCACAGAA     |
| CDC45              | CTTGAAGTTCCTCGCTATGAAG   | GCATGGTTTGCTCCACTATCTC   |
| USP1               | TCATTTTCGGTTGAACAGCTCC   | CCCTCAGTGTGTTAAGCAGTC    |
| TRA2B              | GCAGTCTAGGCGTTCAAGAGG    | CATTGGCACGTTCTTTAGCTTC   |
| PPM1G              | GAGCTGCTGACACGCTACG      | TTCCCTAGTTGAGTCCTCAGG    |
| RANBP1             | AATACAGACGAGTCCAACCATGA  | GAACAGTTTTGCCCAGATTTTA   |
| CDK4               | ATGGCTACCTCTCGATATGAGC   | CATTGGGGACTCTCACACTCT    |
| SRSF3              | TGGCAACAAGACGGAATTGGA    | CAAAGCCGGGTGGGTTTCTA     |
| NOP56              | ACAGGAGGAGTTAGGGTACAAC   | GATTGTGGAAGTGCAGACGAA    |
| UBA2               | TTCTCCACATCGACCTGATT     | ACCTGTGCCTTTGATCTTCCA    |
| HNRNPA2B1          | ATTGATGGGAGAGTAGTTGAGCC  | AATTCCGCCAACAAACAGCTT    |
| HNRNPU             | GAGCATCCTATGGTGTGTCAAA   | TGACCAGCCAATACGAACTTC    |
| CSTF2              | CAGCGGTGGATCGTTCTCTAC    | AACAACAGGTCCAACCTCAGA    |
| NCBP1              | GGAGAGCAACCTAGAAGGCTT    | AGGTAATAGGCGTGCAACTGT    |
| HPRT1              | CCTGGCGTCGTGATTAGTGAT    | AGACGTTTCAGTCCTGTCCATAA  |
| PSMD14             | GATGGTTGTTGGTTGGTATCACAA | AGCTCTCTCCGACAAGGCTT     |
| PSMA2              | GAGCGCGGGTACAGCTTTT      | ACCACACCATTTGCAGCTTTA    |
| DDX18              | ATGTCACACCTGCCGATGAAA    | CCCTGAAACTTTAGGTTCCGC    |
| PSMC4              | CCGCTGGTCATCGGACAATTT    | GCGCACATAATAGTTGGAGCCT   |
| XPOT               | CAAGTCTTCGCCTTGCTTTTTG   | CCCTTGGATTTAGGTCCACTACT  |
| PGK1               | GACCTAATGTCCAAAGCTGAGAA  | CAGCAGGTATGCCAGAAGCC     |
| ODC1               | GTTTTGCGGATTGCCACTGAT    | GCTCTTTCGCCCGTTCCAA      |
| SF3A1              | TTCACGAAGCTAGTGGAACAGT   | GGTAACACACCTGATCCAAAACCT |
| IFRD1              | GAGTGCGAAGACAAGGCAAG     | GCAGCGTTCAATGCTATCAGTT   |
| GAPDH              | CTGGGCTACACTGAGCACC      | AAGTGGTCGTTGAGGGCAATG    |
| <b>ChIP assay:</b> |                          |                          |
| <b>Gene Symbol</b> | <b>Forward</b>           | <b>Reverse</b>           |
| POLD1              | CACGAGGTTCGTGAAGGTAGC    | TCGCCCCCTTGCTGAAAAAT     |
| CDK4               | CGTGAGGTAAGTGCAGTCCC     | CATAACCAGCTCGCGAAACG     |
| CDC45              | AAGAGAAAAGGCCAGGCGAA     | GGGGAAATAAATCACGAAAGGGC  |
| HNRNPU             | GCCAGTCTCCTCGATGATTCCG   | CGCTCTTTCGGGATACACG      |
| PSMC4              | ACGATCAATCCCTTCTGTGG     | CCAACTGCTCTTCGCTTTCT     |

**Supplementary Table 5. Clinicopathological characteristics of TCGA cohort.**

|                | Variables | POLD1 expression |              |             | p value       | Statistics method (two-tailed) |
|----------------|-----------|------------------|--------------|-------------|---------------|--------------------------------|
|                |           | Total (n=398)    | High (n=199) | Low (n=199) |               |                                |
| Gender (%)     | Female    | 108 (27.14)      | 52 (26.13)   | 56 (28.14)  | 0.7352        | Chi-square                     |
|                | Male      | 290 (72.86)      | 147 (73.87)  | 143 (71.86) |               |                                |
| Age (year) (%) | < 65      | 149 (37.53)      | 72 (36.18)   | 77 (38.89)  | 0.6502        | Chi-square                     |
|                | >= 65     | 248 (62.47)      | 127 (63.82)  | 121 (61.11) |               |                                |
| Subtype (%)    | MIBC      | 392 (98.49)      | 197 (98.99)  | 195 (97.99) | 0.6808        | Chi-square                     |
|                | NMIBC     | 6 (1.51)         | 2 (1.01)     | 4 (2.01)    |               |                                |
| Stage (%)      | I         | 3 (0.75)         | 0 (0.00)     | 3 (1.51)    | 0.0714        | Fisher's exact                 |
|                | II        | 108 (27.14)      | 48 (24.12)   | 60 (30.15)  |               |                                |
|                | III       | 147 (36.93)      | 83 (41.71)   | 64 (32.16)  |               |                                |
|                | IV        | 138 (34.67)      | 67 (33.67)   | 71 (35.68)  |               |                                |
| Grade (%)      | High      | 376 (94.95)      | 195 (98.48)  | 181 (91.41) | <b>0.002</b>  | Fisher's exact                 |
|                | Low       | 20 (5.05)        | 3 (1.52)     | 17 (8.59)   |               |                                |
| T (%)          | Tx        | 1 (0.25)         | 0 (0.00)     | 1 (0.50)    | 0.1227        | Fisher's exact                 |
|                | T0        | 1 (0.25)         | 1 (0.50)     | 0 (0.00)    |               |                                |
|                | T1        | 4 (1.01)         | 1 (0.50)     | 3 (1.51)    |               |                                |
|                | T2        | 124 (31.16)      | 54 (27.14)   | 70 (35.18)  |               |                                |
|                | T3        | 206 (51.76)      | 114 (57.29)  | 92 (46.23)  |               |                                |
|                | T4        | 62 (15.58)       | 29 (14.57)   | 33 (16.58)  |               |                                |
| M (%)          | Mx        | 195 (49.12)      | 111 (56.06)  | 84 (42.21)  | <b>0.019</b>  | Fisher's exact                 |
|                | M0        | 194 (48.87)      | 83 (41.92)   | 111 (55.78) |               |                                |
|                | M1        | 8 (2.02)         | 4 (2.02)     | 4 (2.01)    |               |                                |
| N (%)          | NX        | 27 (6.78)        | 10 (5.03)    | 17 (8.54)   | <b>0.0123</b> | Fisher's exact                 |
|                | N0        | 236 (59.30)      | 123 (61.81)  | 113 (56.78) |               |                                |
|                | N1        | 48 (12.06)       | 31 (15.58)   | 17 (8.54)   |               |                                |
|                | N2        | 80 (20.10)       | 30 (15.08)   | 50 (25.13)  |               |                                |
|                | N3        | 7 (1.76)         | 5 (2.51)     | 2 (1.01)    |               |                                |

POLD1 expression group: The median of the POLD1 expression was cutoff value.

NMIBC: non-muscular invasive bladder cancer.

MIBC: muscular invasive bladder cancer.

Statistical significance was determined by two-tailed Chi-square or two-tailed Fisher's exact test. No adjustments were made for multiple comparisons.

**Supplementary Table 6. Clinicopathological characteristics of UROMOL cohort.**

|                | Variables | POLD1 expression |              |             | p value          | Statistics method (two-tailed) |
|----------------|-----------|------------------|--------------|-------------|------------------|--------------------------------|
|                |           | Total (n=476)    | High (n=238) | Low (n=238) |                  |                                |
| Gender (%)     | Female    | 109 (22.90)      | 56 (23.53)   | 53 (22.27)  | 0.8273           | Chi-square                     |
|                | Male      | 367 (77.10)      | 182 (76.47)  | 185 (77.73) |                  |                                |
| Age (year) (%) | < 65      | 168 (35.29)      | 74 (31.09)   | 94 (39.50)  | 0.0684           | Chi-square                     |
|                | >= 65     | 308 (64.71)      | 164 (68.91)  | 144 (60.50) |                  |                                |
| Subtype (%)    | MIBC      | 16 (3.36)        | 15 (6.30)    | 1 (0.42)    | <b>0.0009</b>    | Chi-square                     |
|                | NMIBC     | 460 (96.64)      | 223 (93.70)  | 237 (99.58) |                  |                                |
| Stage (%)      | CIS       | 3 (0.63)         | 3 (1.26)     | 0 (0.00)    | <b>1.811e-09</b> | Fisher's exact                 |
|                | Ta        | 345 (72.48)      | 144 (60.50)  | 201 (84.45) |                  |                                |
|                | T1        | 112 (23.53)      | 76 (31.93)   | 36 (15.13)  |                  |                                |
|                | T2-4      | 16 (3.36)        | 15 (6.30)    | 1 (0.42)    |                  |                                |
| Grade (%)      | High      | 192 (40.34)      | 131 (55.04)  | 61 (25.63)  | <b>6.595e-11</b> | Fisher's exact                 |
|                | Low       | 277 (58.19)      | 106 (44.54)  | 171 (71.85) |                  |                                |
|                | PUNLMP    | 7 (1.47)         | 1 (0.42)     | 6 (2.52)    |                  |                                |
| Tumor Size (%) | < 3 cm    | 283 (59.45)      | 131 (55.04)  | 152 (63.87) | 0.0588           | Chi-square                     |
|                | >= 3 cm   | 87 (18.28)       | 51 (21.43)   | 36 (15.13)  |                  |                                |

POLD1 expression group: The median of the POLD1 expression was cutoff value.

Tumor size: The longest diameter, cm.

NMIBC: non-muscular invasive bladder cancer.

MIBC: muscular invasive bladder cancer.

Statistical significance was determined by two-tailed Chi-square or two-tailed Fisher's exact test. No adjustments were made for multiple comparisons.

**Supplementary Table 7. Clinicopathological characteristics of GSE32984 cohort.**

|                | Variables | POLD1 expression |              |             | p value          | Statistics method (two-tailed) |
|----------------|-----------|------------------|--------------|-------------|------------------|--------------------------------|
|                |           | Total (n=224)    | High (n=112) | Low (n=112) |                  |                                |
| Gender (%)     | Famale    | 61 (27.23)       | 31 (27.68)   | 30 (26.79)  | 1                | Chi square                     |
|                | Male      | 163 (72.77)      | 81 (72.32)   | 82 (73.21)  |                  |                                |
| Age (year) (%) | < 65      | 79 (35.27)       | 46 (41.07)   | 33 (29.46)  | 0.0933           | Chi square                     |
|                | >= 65     | 145 (64.73)      | 66 (58.93)   | 79 (70.54)  |                  |                                |
| Subtype (%)    | MIBC      | 51 (22.77)       | 43 (38.39)   | 8 (7.14)    | <b>6.046e-08</b> | Chi square                     |
|                | NMIBC     | 173 (77.23)      | 69 (61.61)   | 104 (92.86) |                  |                                |
| Stage (%)      | Ta        | 110 (49.11)      | 34 (30.36)   | 76 (67.86)  | <b>2.274e-09</b> | Fisher's exact                 |
|                | T1        | 63 (28.12)       | 35 (31.25)   | 28 (25.00)  |                  |                                |
|                | T2        | 43 (19.20)       | 36 (32.14)   | 7 (6.25)    |                  |                                |
|                | T3        | 7 (3.12)         | 6 (5.36)     | 1 (0.89)    |                  |                                |
|                | T4        | 1 (0.45)         | 1 (0.89)     | 0 (0.00)    |                  |                                |
| Grade (%)      | Gx        | 2 (0.89)         | 2 (1.79)     | 0 (0.00)    | <b>7.491e-10</b> | Fisher's exact                 |
|                | G1        | 45 (20.09)       | 9 (8.04)     | 36 (32.14)  |                  |                                |
|                | G2        | 84 (37.50)       | 33 (29.46)   | 51 (45.54)  |                  |                                |
|                | G3        | 93 (41.52)       | 68 (60.71)   | 25 (22.32)  |                  |                                |

POLD1 expression group: The median of the POLD1 expression was cutoff value.

NMIBC: non-muscular invasive bladder cancer;

MIBC: muscular invasive bladder cancer.

Statistical significance was determined by two-tailed Chi-square or two-tailed Fisher's exact test. No adjustments were made for multiple comparisons.



**Supplementary Table 8. Clinicopathological characteristics of HBlau079Su01 cohort.**

|                | Variables  | POLD1 expression |             |            | p value       | Statistics method (two-tailed) |
|----------------|------------|------------------|-------------|------------|---------------|--------------------------------|
|                |            | Total (n=63)     | High (n=26) | Low (n=37) |               |                                |
| Gender (%)     | female     | 53 (84.13)       | 23 (88.46)  | 30 (81.08) | 0.6606        | Chi-square                     |
|                | male       | 10 (15.87)       | 3 (11.54)   | 7 (18.92)  |               |                                |
| Age (year) (%) | < 65       | 22 (35.48)       | 9 (34.62)   | 13 (36.11) | 1             | Chi-square                     |
|                | >= 65      | 40 (64.52)       | 17 (65.38)  | 23 (63.89) |               |                                |
| Subtype (%)    | MIBC       | 42 (66.67)       | 23 (88.46)  | 19 (51.35) | <b>0.0067</b> | Chi-square                     |
|                | NMIBC      | 16 (25.40)       | 3 (11.54)   | 13 (35.14) |               |                                |
| AJCC stage (%) | < StageII  | 11 (17.46)       | 1 (3.85)    | 10 (27.03) | <b>0.0134</b> | Fisher's exact                 |
|                | >= StageII | 43 (68.25)       | 23 (88.46)  | 20 (54.05) |               |                                |
| T (%)          | < T2       | 16 (25.40)       | 3 (11.54)   | 13 (35.14) | <b>0.0049</b> | Fisher's exact                 |
|                | >= T2      | 42 (66.67)       | 23 (88.46)  | 19 (51.35) |               |                                |
| N (%)          | N >= 1     | 8 (12.70)        | 5 (19.23)   | 3 (8.11)   | 0.5095        | Fisher's exact                 |
|                | N0         | 45 (71.43)       | 17 (65.38)  | 28 (75.68) |               |                                |
| Tumor Size (%) | < 3 cm     | 17 (29.82)       | 8 (32.00)   | 9 (28.12)  | 0.9796        | Chi-square                     |
|                | >= 3 cm    | 40 (70.18)       | 17 (68.00)  | 23 (71.88) |               |                                |

POLD1 staining score = The intensity of nuclear \* Positive area

POLD1 staining group: ≤ 120 is low; > 120 is high.

Tumor size: The longest diameter, cm.

NMIBC: non-muscular invasive bladder cancer;

MIBC: muscular invasive bladder cancer.

Statistical significance was determined by two-tailed Chi-square or two-tailed Fisher's exact test. No adjustments were made for multiple comparisons.

**Supplementary Table 9. Clinicopathological characteristics of GSE13507 cohort.**

|                | Variables | POLD1 expression |             |            | p value         | Statistics method (two-tailed) |
|----------------|-----------|------------------|-------------|------------|-----------------|--------------------------------|
|                |           | Total (n=165)    | High (n=82) | Low (n=83) |                 |                                |
| Gender (%)     | Female    | 30 (18.18)       | 18 (21.95)  | 12 (14.46) | 0.2956          | Chi-square                     |
|                | Male      | 135 (81.82)      | 64 (78.05)  | 71 (85.54) |                 |                                |
| Age (year) (%) | >= 65     | 91 (55.15)       | 50 (60.98)  | 41 (49.40) | 0.1807          | Chi-square                     |
|                | < 65      | 74 (44.85)       | 32 (39.02)  | 42 (50.60) |                 |                                |
| Subtype (%)    | NMIBC     | 103 (62.42)      | 42 (51.22)  | 61 (73.49) | <b>0.0052</b>   | Chi-square                     |
|                | MIBC      | 62 (37.58)       | 40 (48.78)  | 22 (26.51) |                 |                                |
| T (%)          | Ta        | 24 (14.55)       | 7 (8.54)    | 17 (20.48) | <b>0.0043</b>   | Fisher's exact                 |
|                | T1        | 80 (48.48)       | 36 (43.90)  | 44 (53.01) |                 |                                |
|                | T2        | 31 (18.79)       | 16 (19.51)  | 15 (18.07) |                 |                                |
|                | T3        | 19 (11.52)       | 16 (19.51)  | 3 (3.61)   |                 |                                |
|                | T4        | 11 (6.67)        | 7 (8.54)    | 4 (4.82)   |                 |                                |
| M (%)          | M0        | 158 (95.76)      | 78 (95.12)  | 80 (96.39) | 0.7197          | Fisher's exact                 |
|                | M1        | 7 (4.24)         | 4 (4.88)    | 3 (3.61)   |                 |                                |
| N (%)          | Nx        | 1 (0.61)         | 0 (0.00)    | 1 (1.20)   | <b>0.0094</b>   | Fisher's exact                 |
|                | N0        | 149 (90.30)      | 69 (84.15)  | 80 (96.39) |                 |                                |
|                | N1        | 8 (4.85)         | 6 (7.32)    | 2 (2.41)   |                 |                                |
|                | N2        | 6 (3.64)         | 6 (7.32)    | 0 (0.00)   |                 |                                |
|                | N3        | 1 (0.61)         | 1 (1.22)    | 0 (0.00)   |                 |                                |
| Grade (%)      | High      | 60 (36.36)       | 44 (53.66)  | 16 (19.28) | <b>9.49e-06</b> | Chi-square                     |
|                | Low       | 105 (63.64)      | 38 (46.34)  | 67 (80.72) |                 |                                |

POLD1 expression group: The median of the POLD1 expression was cutoff value.

NMIBC: non-muscular invasive bladder cancer;

MIBC: muscular invasive bladder cancer.

Statistical significance was determined by two-tailed Chi-square or two-tailed Fisher's exact test. No adjustments were made for multiple comparisons.
